# Supplementary material for: NUMBL Interacts with TAK1, TRAF6 and NEMO to Negatively Regulate NF-κB Signaling During Osteoclastogenesis
Source: PubMed Central journal article supplement (PMC5626749; doi:10.1038/s41598-017-12707-7), 2017-10-03
Supplement: 41598_2017_12707_MOESM1_ESM.pdf [file 41598_2017_12707_MOESM1_ESM.pdf]

**NUMBL Interacts with TAK1, TRAF6 and NEMO to Negatively Regulate NF- $\kappa$ B Signaling During Osteoclastogenesis**

Gaurav Swarnkar<sup>1</sup>, Tim Hung-Po Chen<sup>1</sup>, Manoj Arra<sup>1</sup>, Amjad M Nasir<sup>1</sup>, Gabriel Mbalaviele<sup>2</sup>, Yousef Abu-Amer\*<sup>1</sup>

<sup>1</sup>Department of Orthopaedic Surgery and Cell Biology & Physiology, Washington University School of Medicine, St. Louis MO 63110

<sup>2</sup>Bone and Mineral Division, Department of Medicine, Washington University School of Medicine, St. Louis MO 63110

Figure S.1A

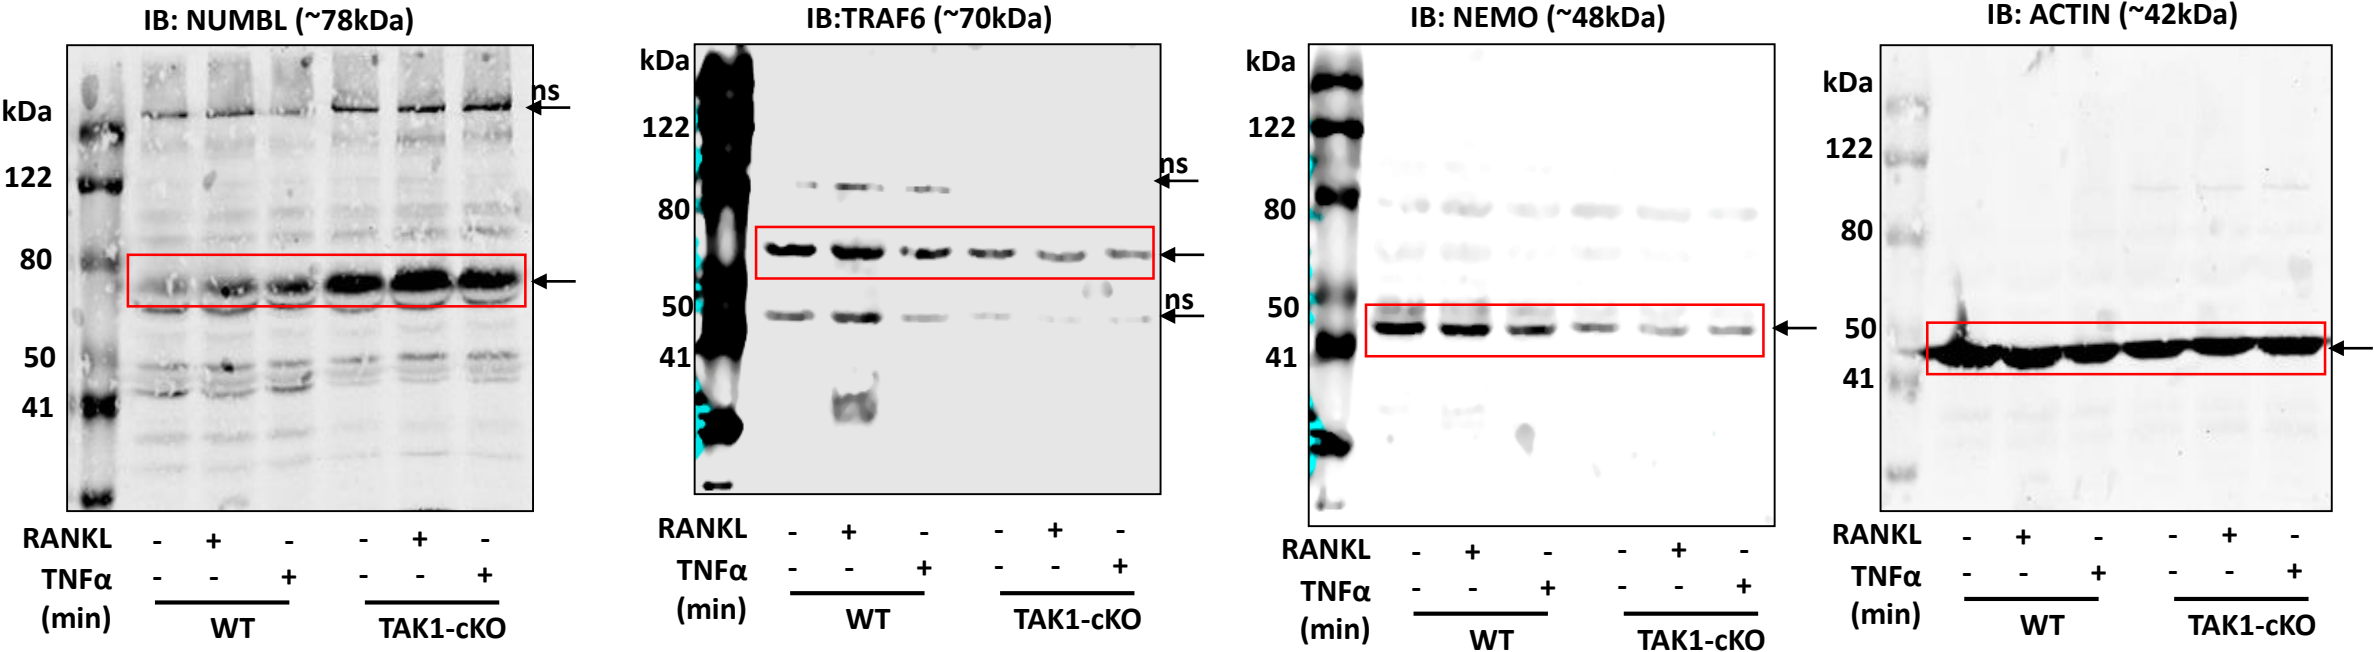

← Expected specific bands  
←<sub>ns</sub> Non-specific bands  
□ Cropped bands shown in the main figure

Figure S.1B

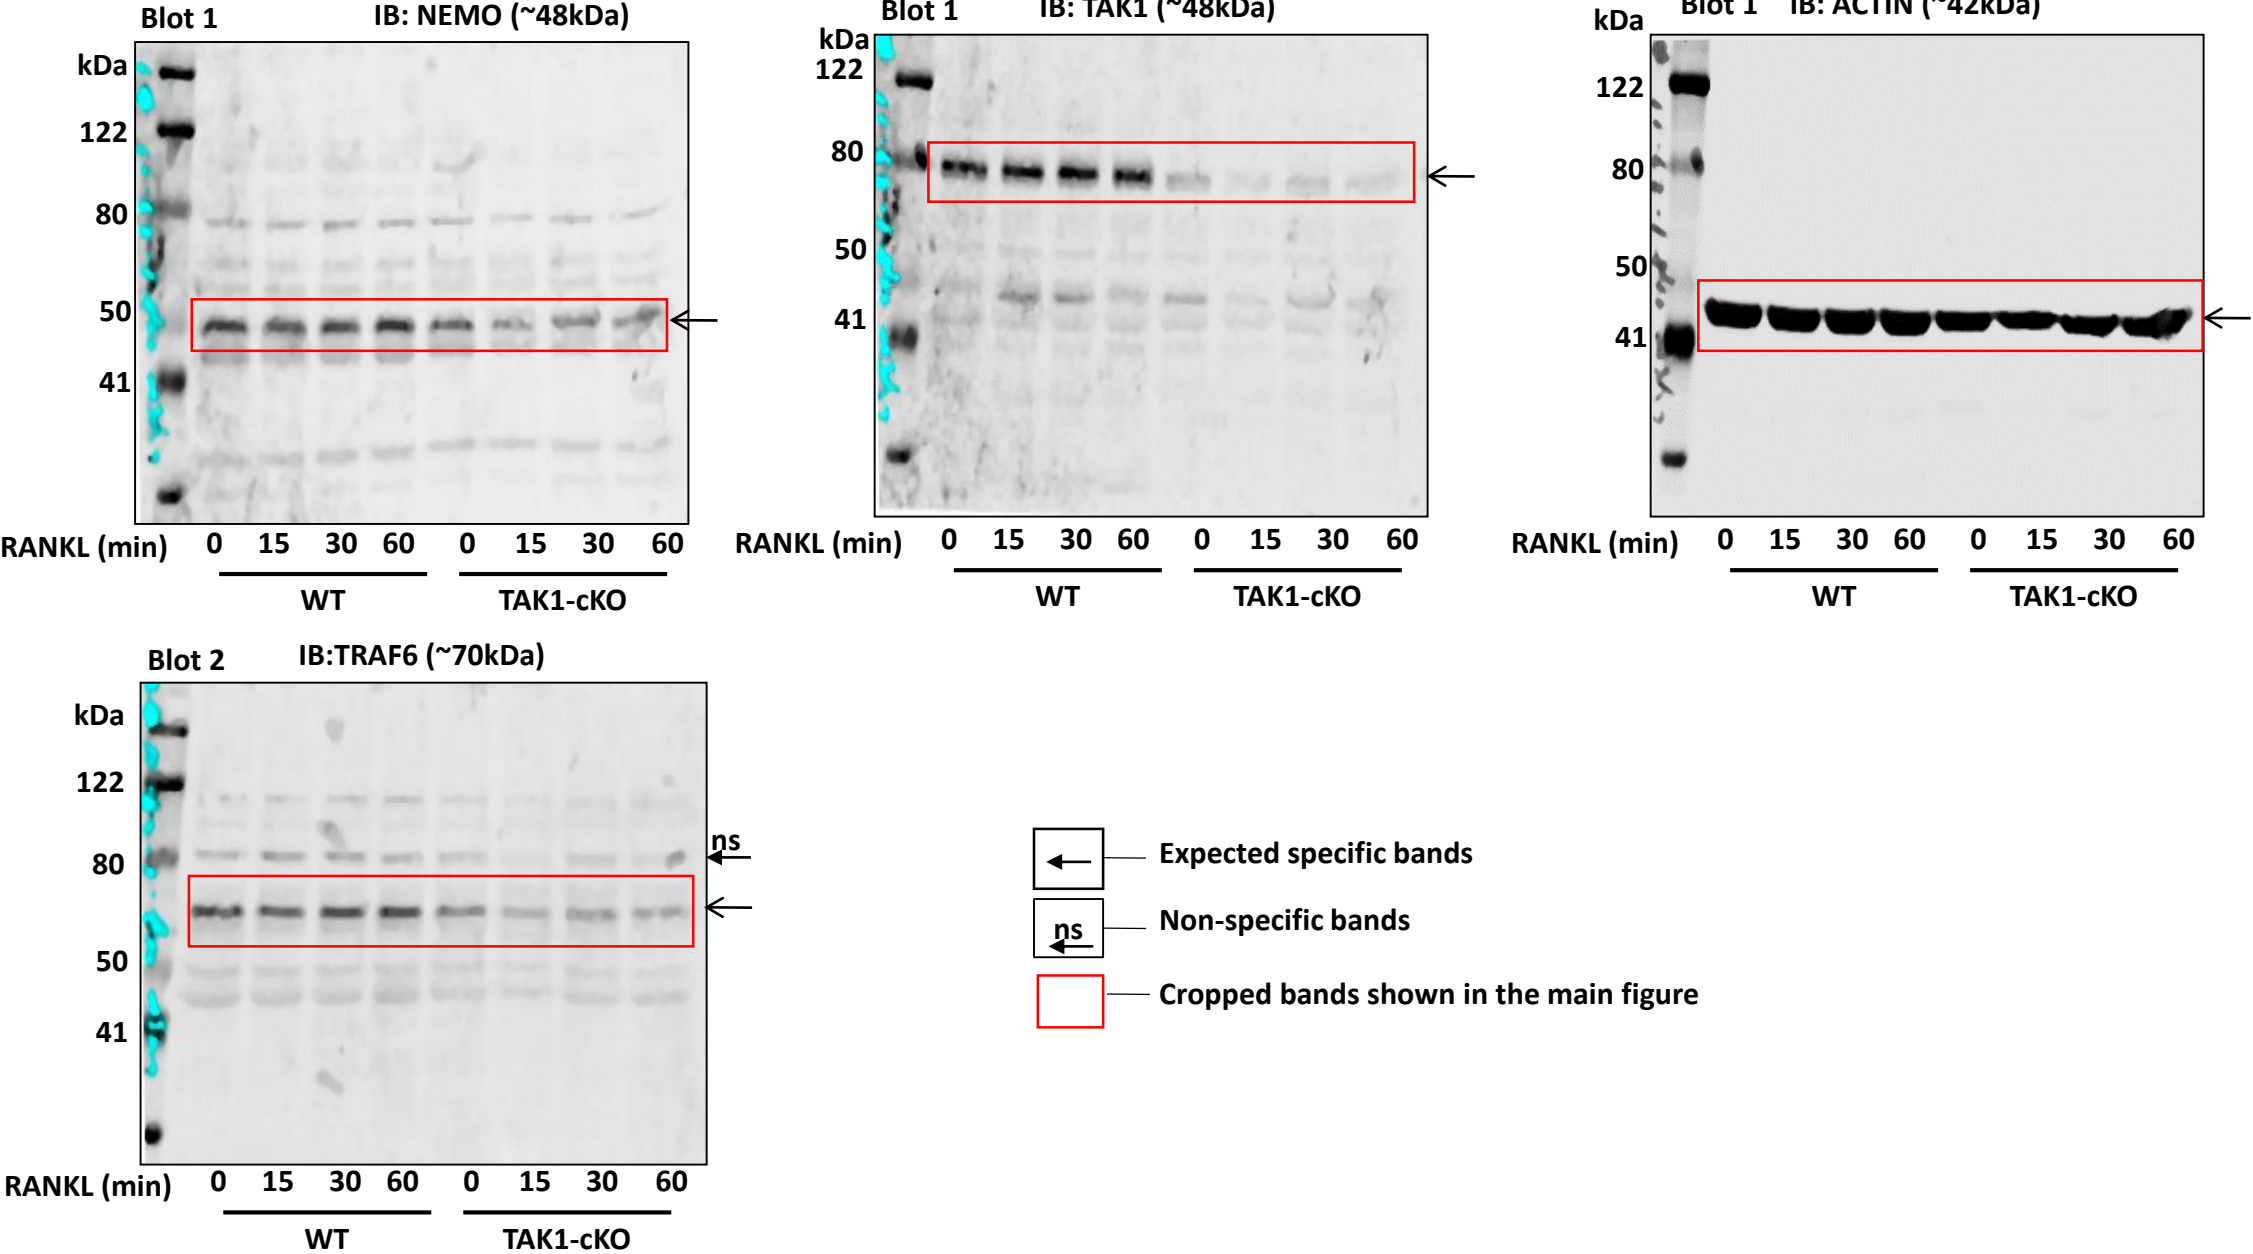

Figure S.1C Blot 1 IB: TRAF6

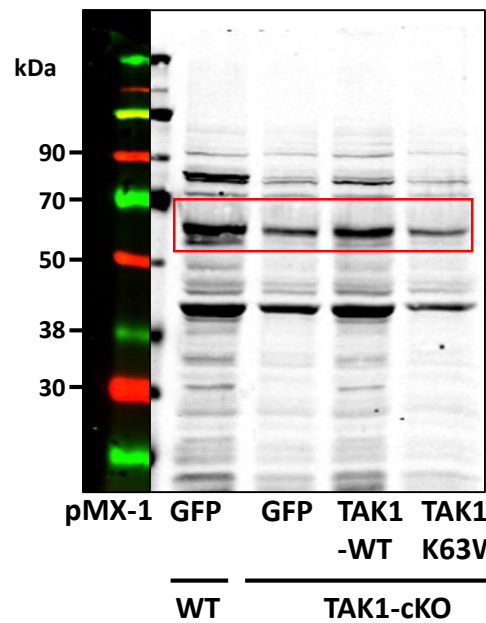

Blot 2 IB: NEMO

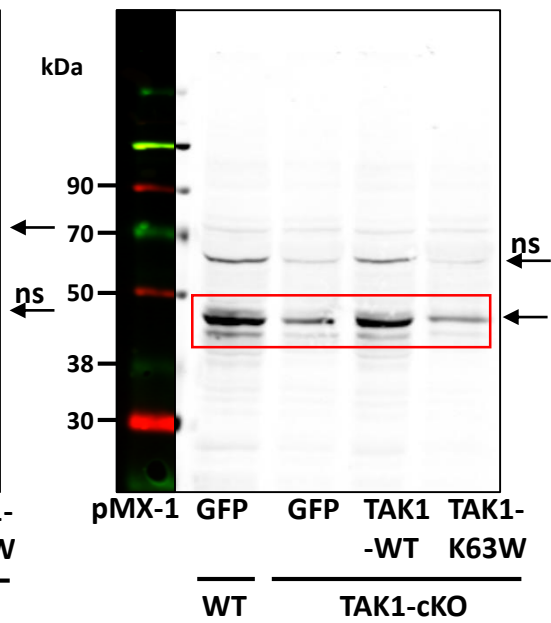

Blot 3 IB: ACTIN

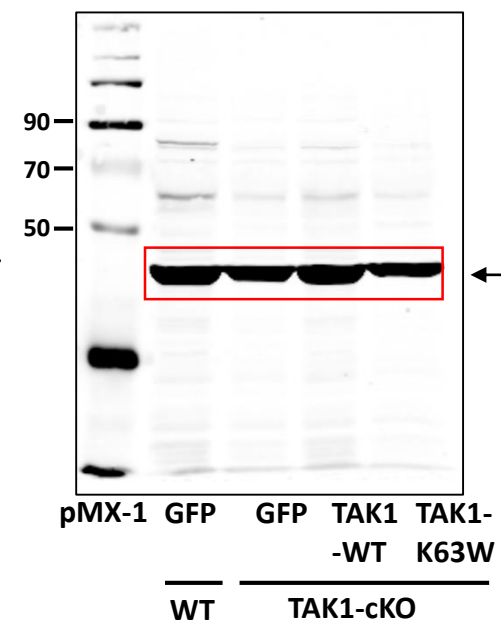

Blot 4 IB: Flag for TAK1

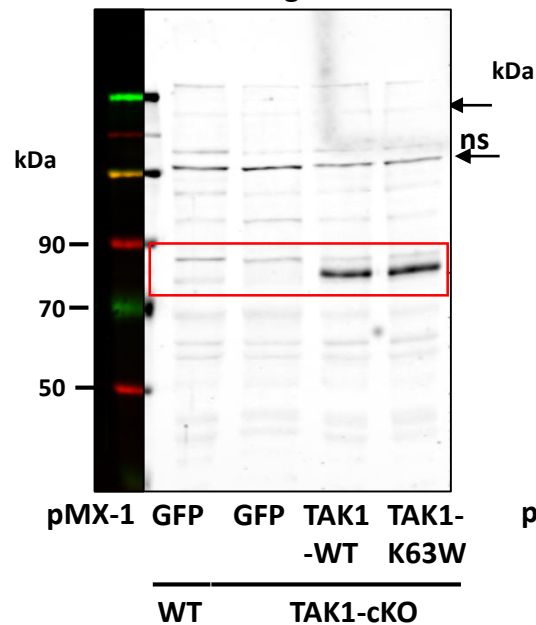

Blot 4 IB: ACTIN

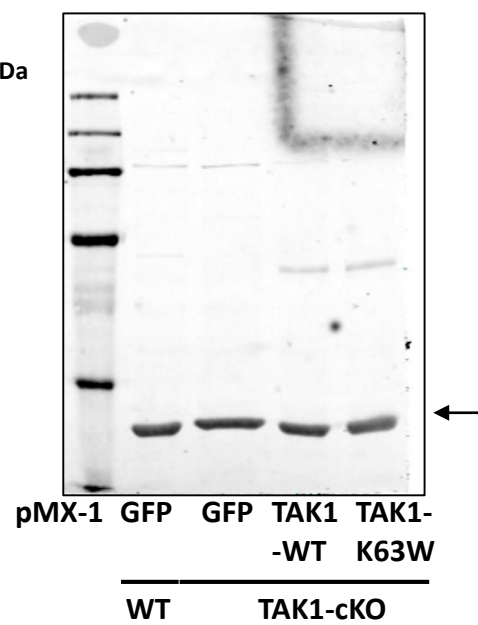

Blot 5 IB: TAK1

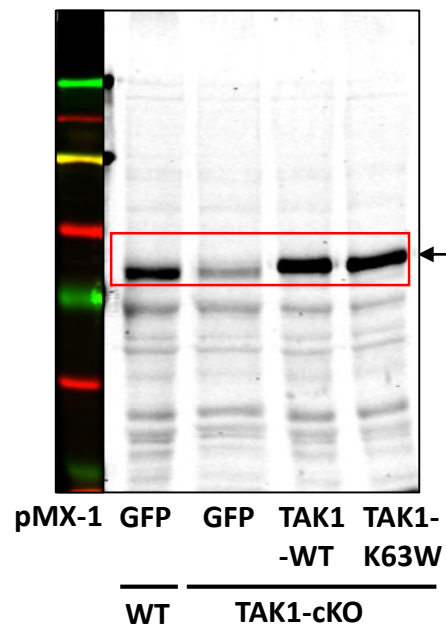

Blot 5 IB: ACTIN

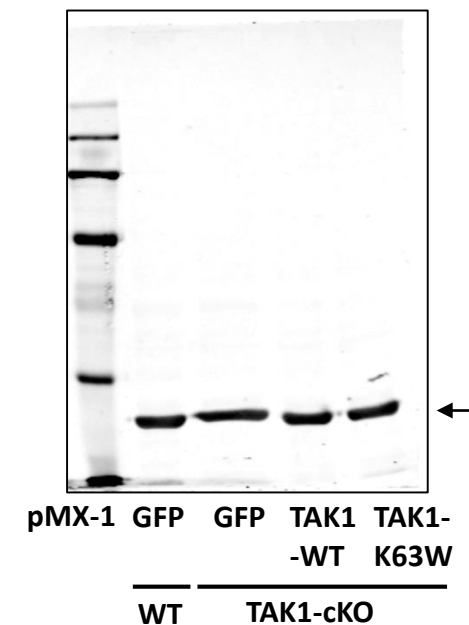

Figure S.2K

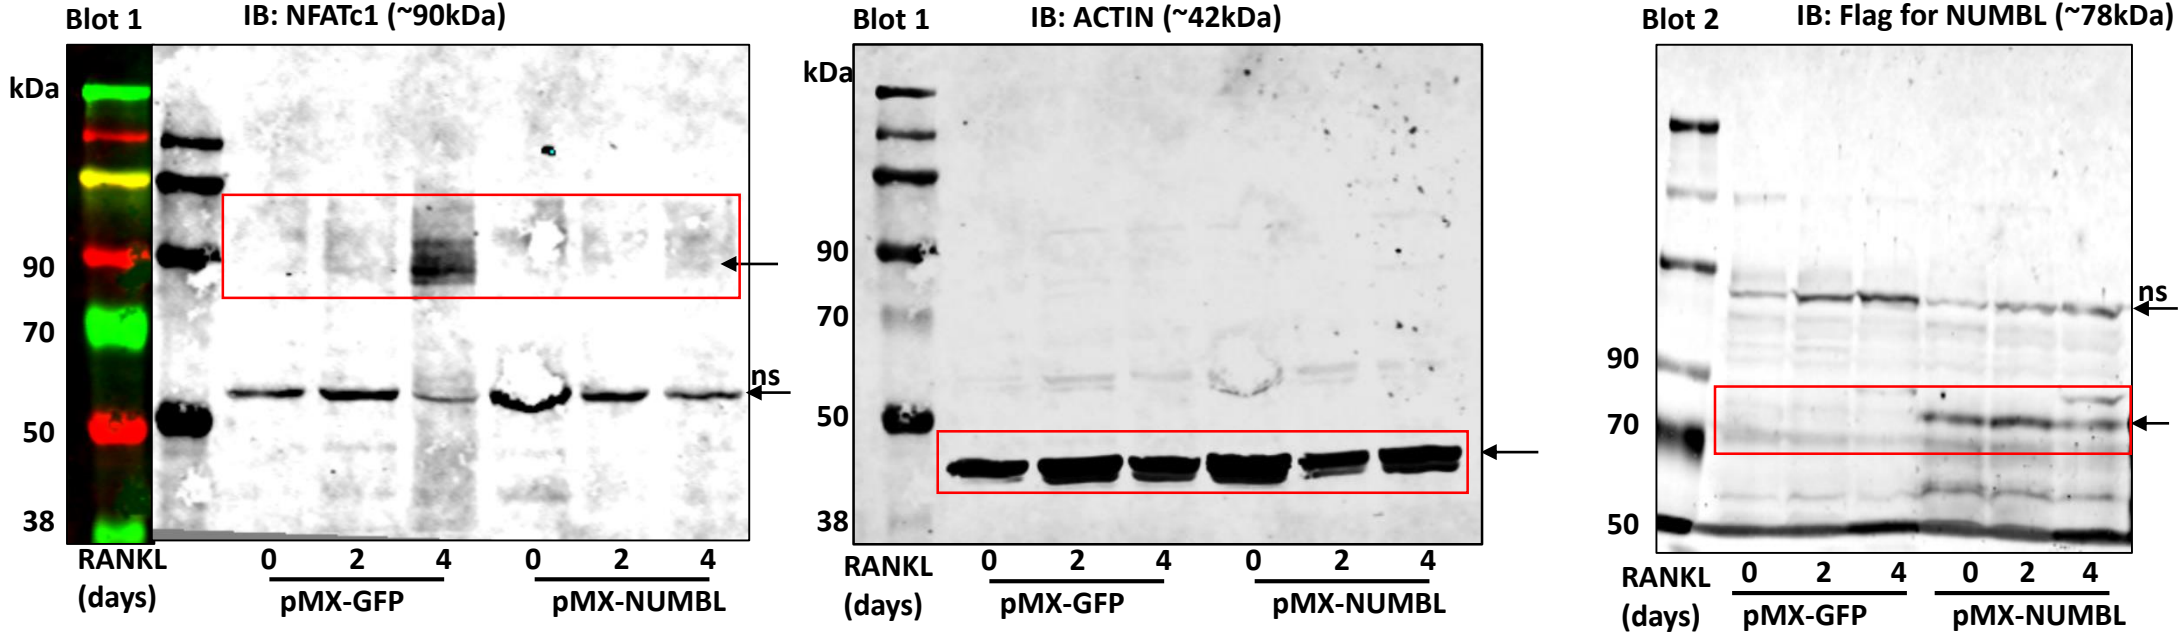

← Expected specific bands  
ns ← Non-specific bands  
Cropped bands shown in the main figure

Figure S.5A

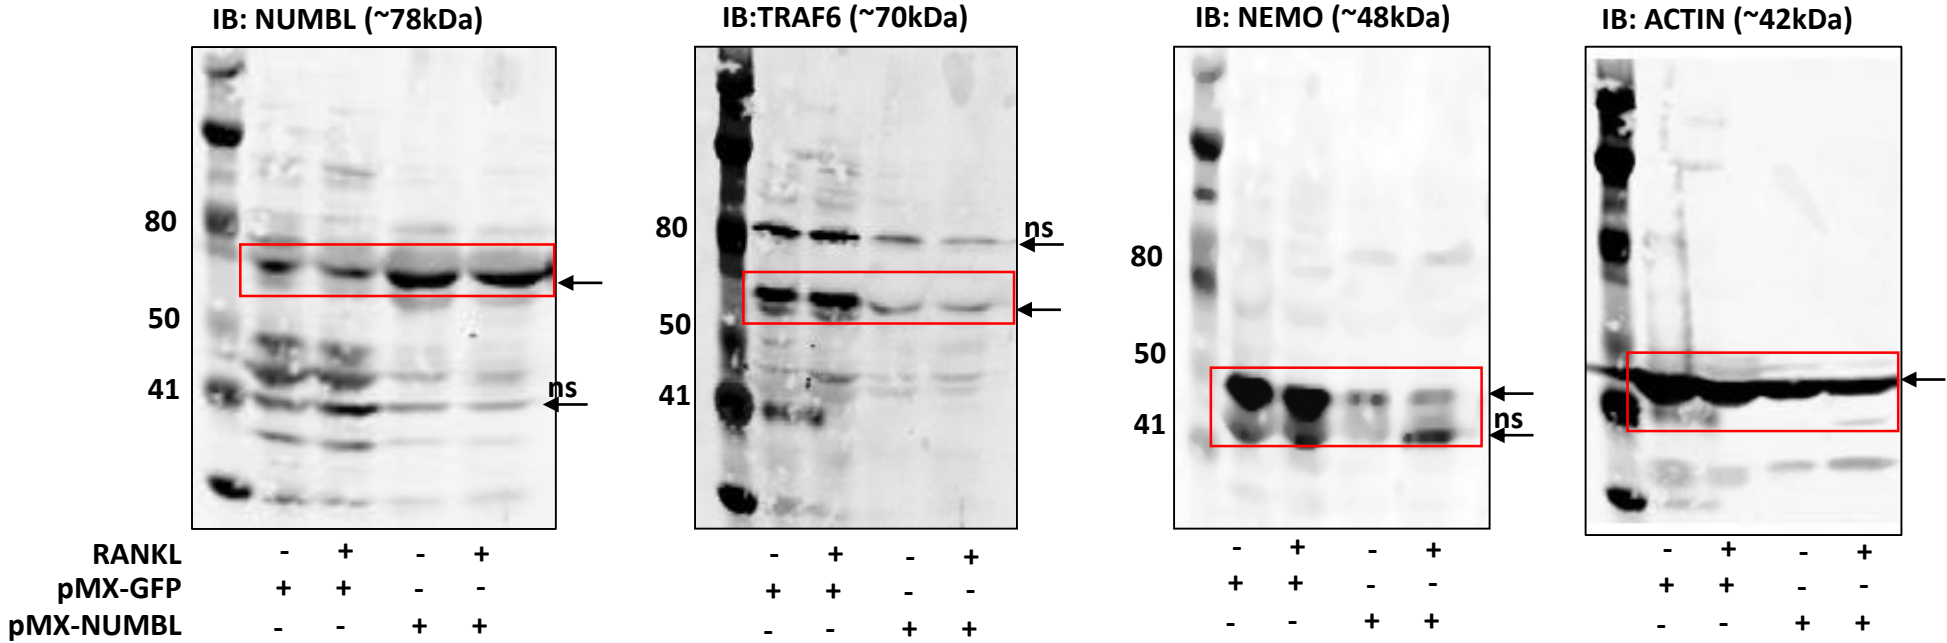

 Expected specific bands  
 Non-specific bands  
 Cropped bands shown in the main figure

Figure S.5B

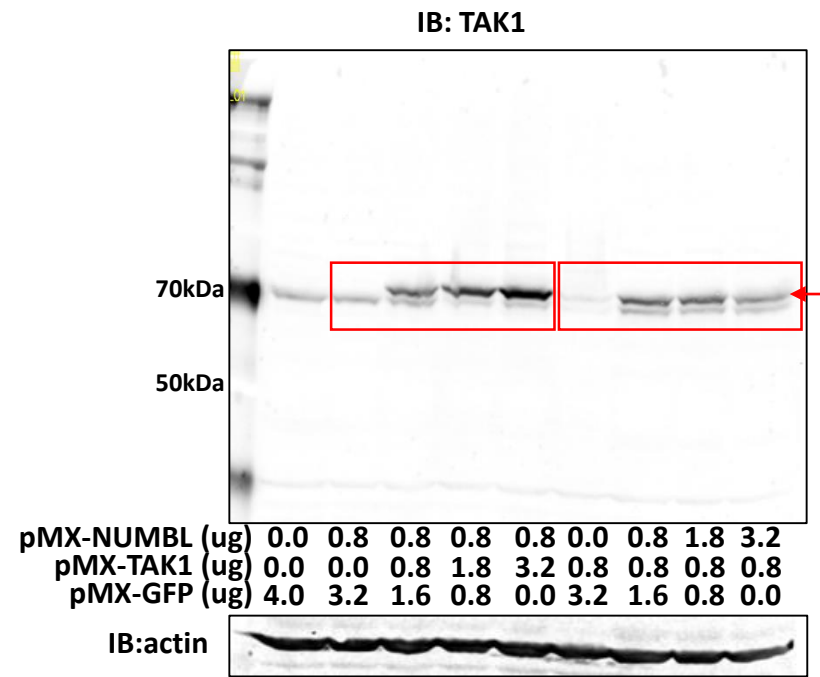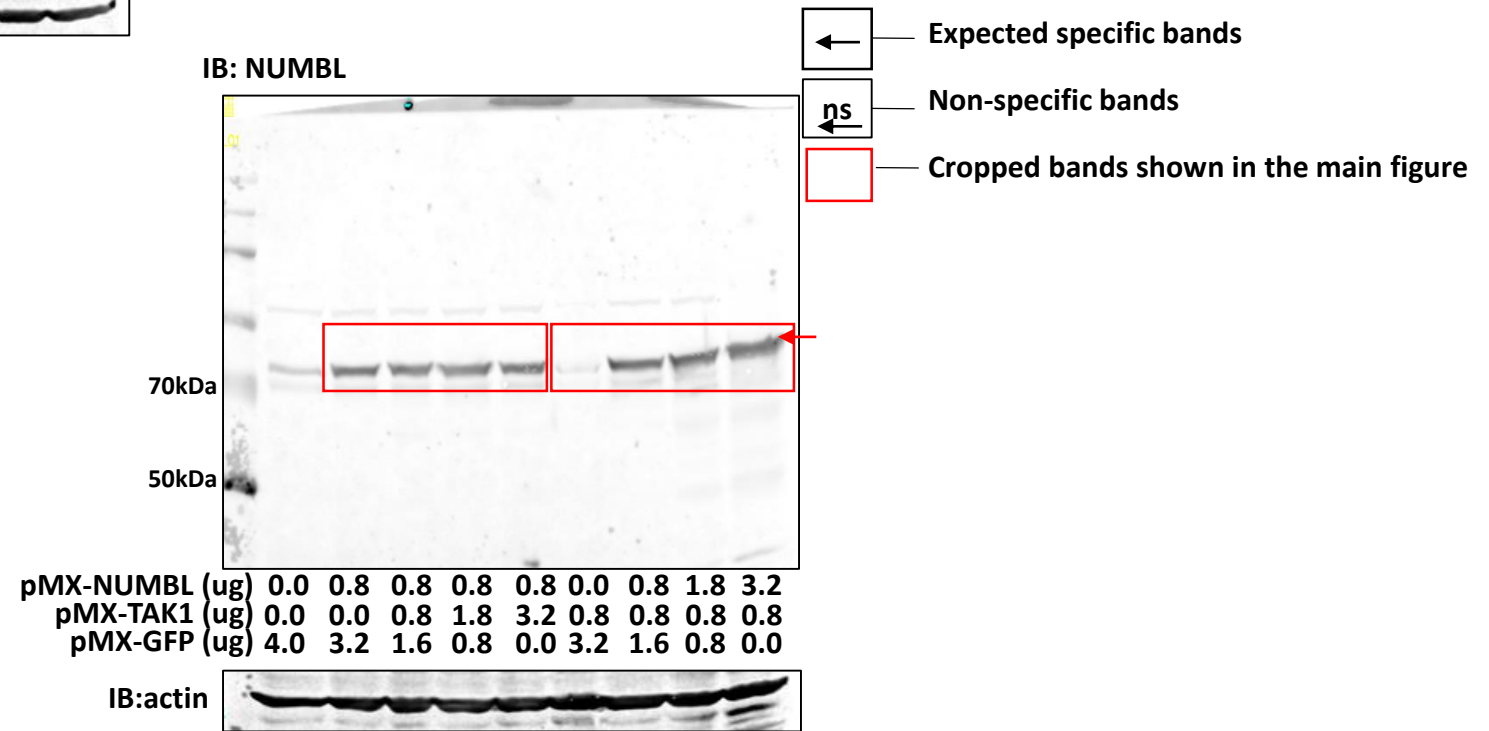

Figure S.5C

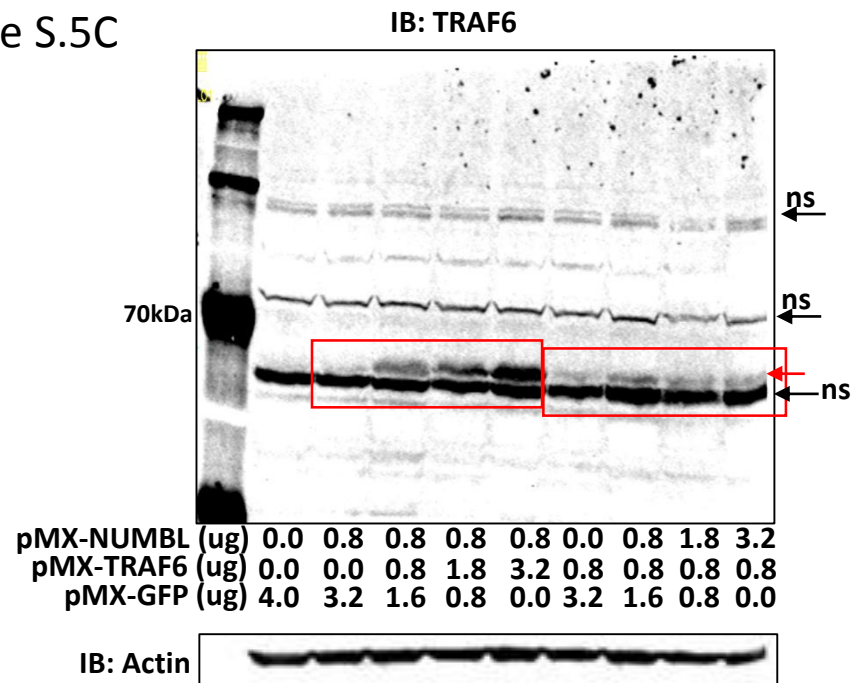

-  Expected specific bands
-  Non-specific bands
-  Cropped bands shown in the main figure

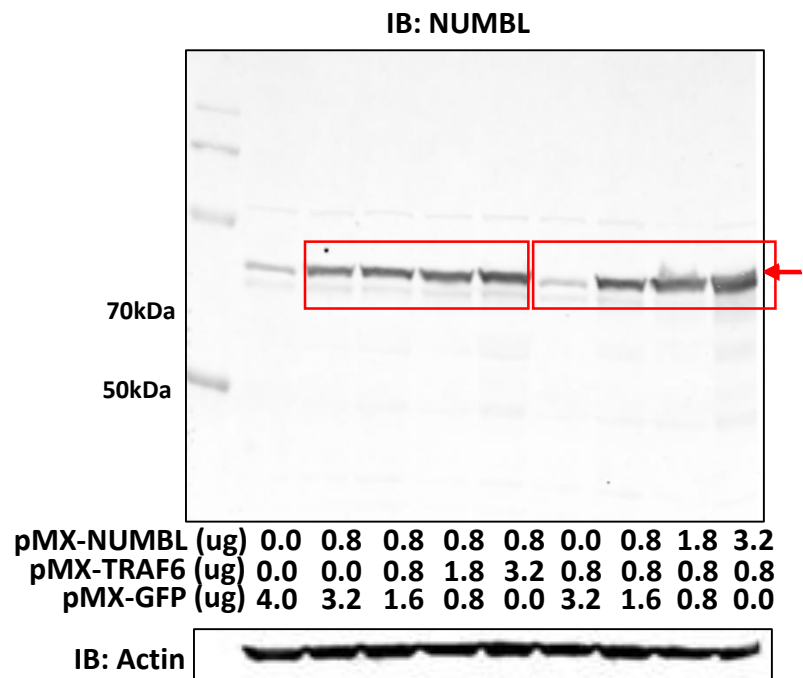



Figure S.5D

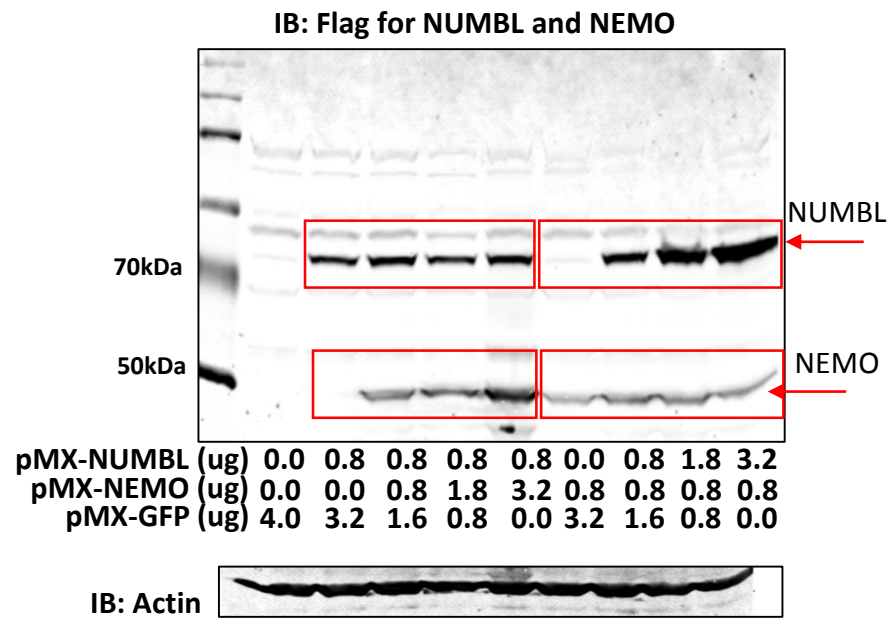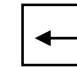

Expected specific bands

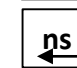

Non-specific bands

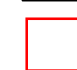

Cropped bands shown in the main figure

Figure S.5E

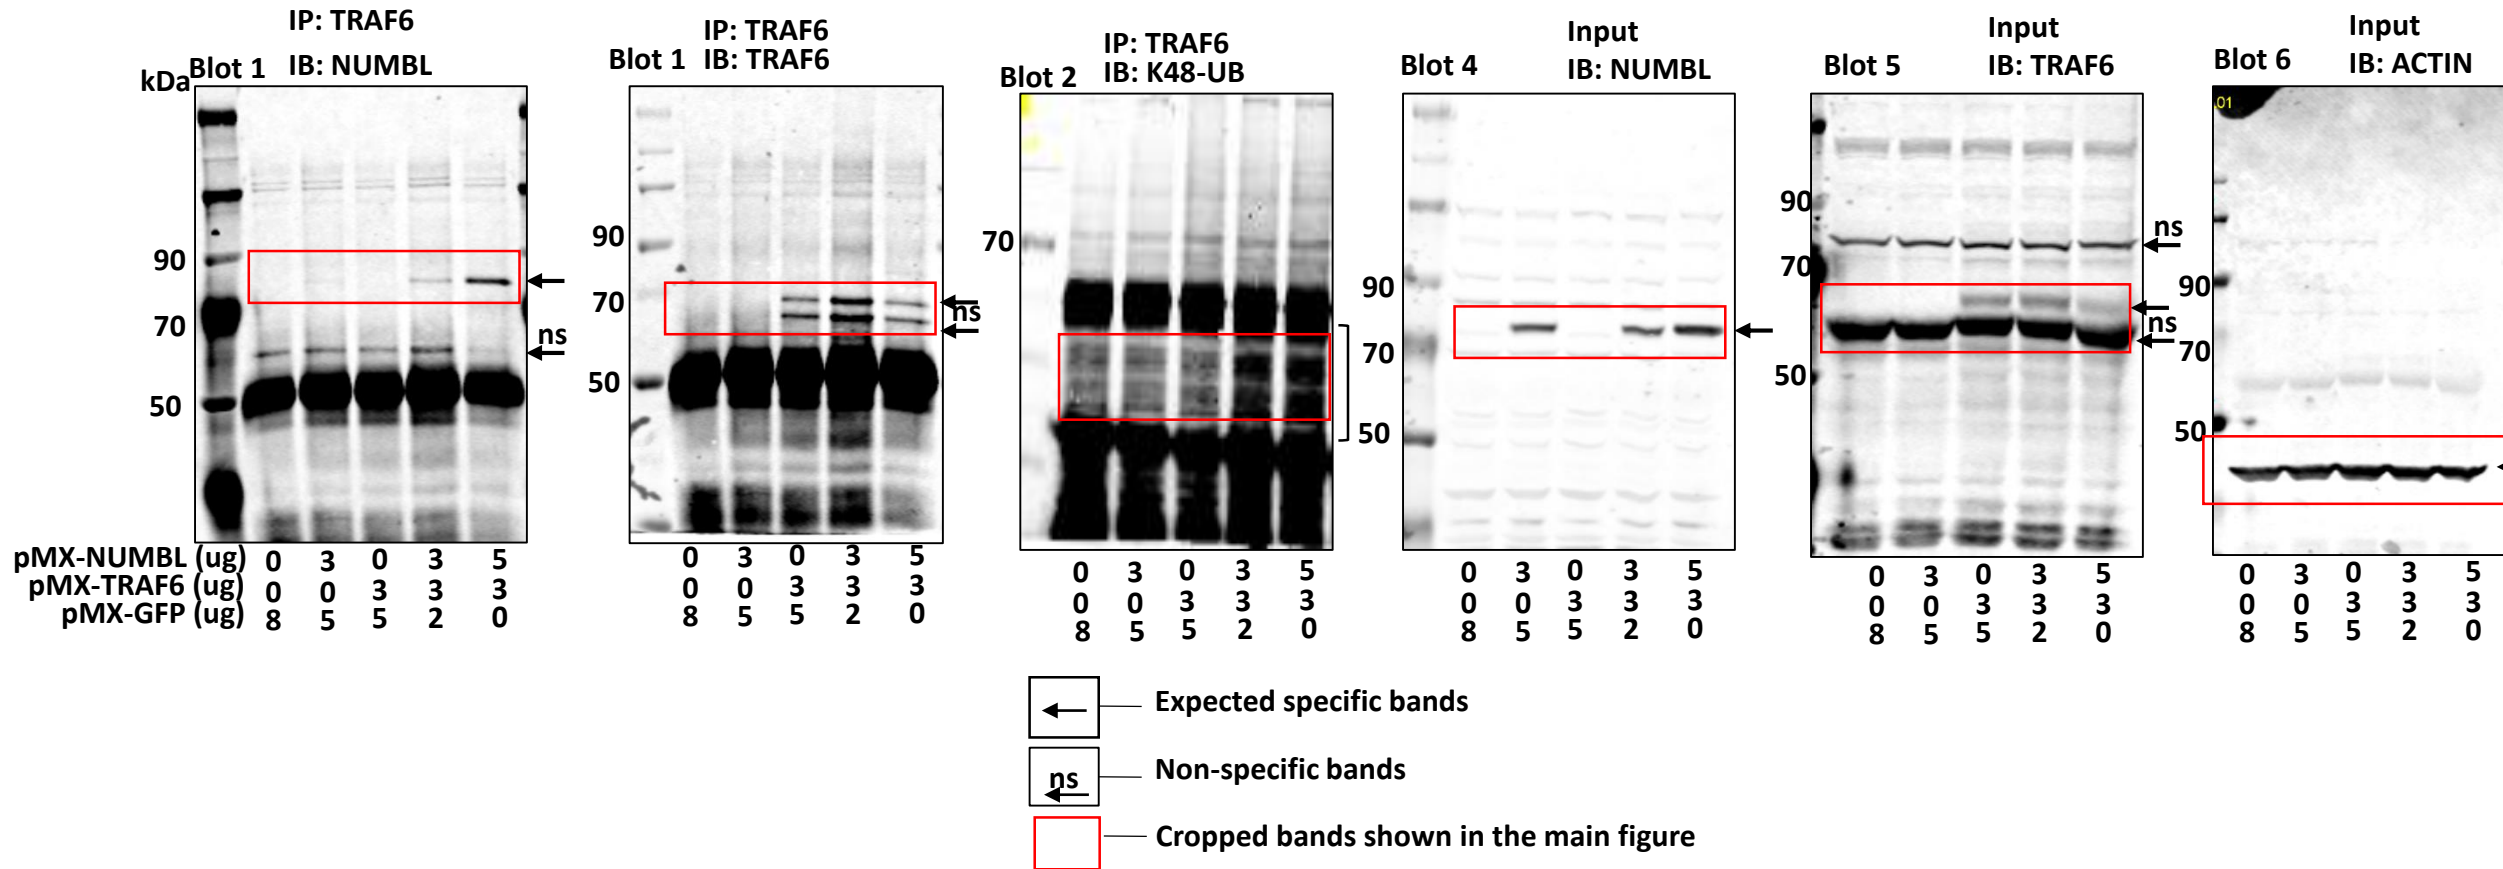

Figure S.5F

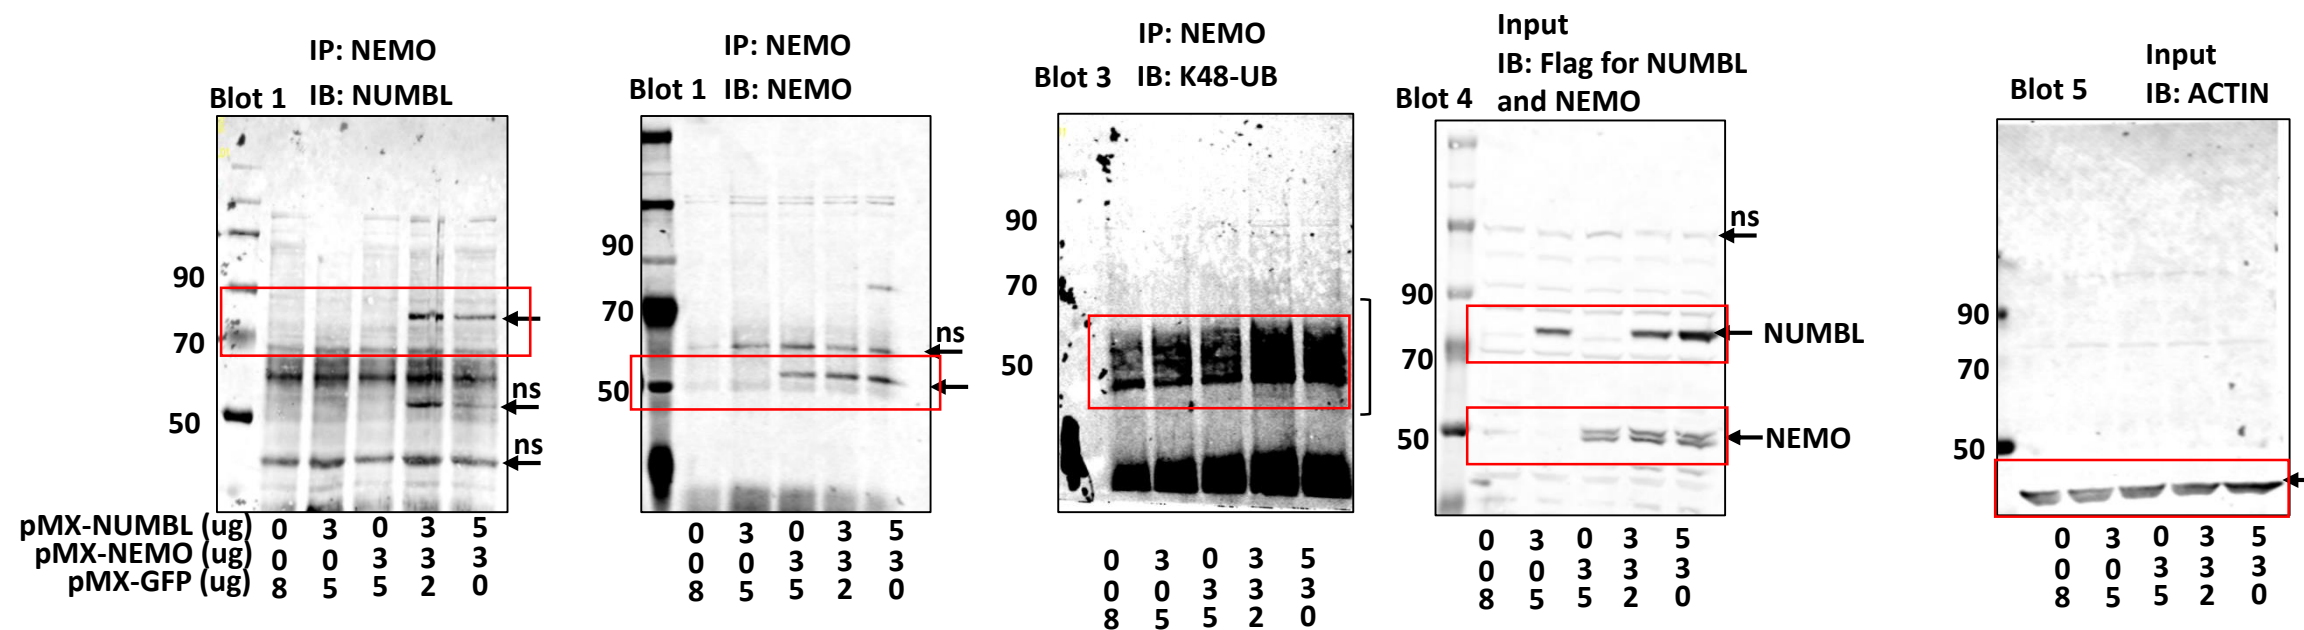

Note: For Blot 4 the membrane was blotted using anti-flag which recognizes both NUMBL and NEMO.

-  Expected specific bands
-  Non-specific bands
-  Cropped bands shown in the main figure
